# Supplementary material for: Significant enhancement in the performance of porphyrin for dye-sensitized solar cells: aggregation control using chenodeoxycholic acid
Source: Royal Society of Chemistry journal article supplement (doi:10.1039/c7nj01184a), 2017-01-01
Supplement: c7nj01184a1.pdf [file c7nj01184a1.pdf]

# Significant Enhancement in the Performance of Porphyrin-Based Dyes for Dye-Sensitized Solar Cells: Aggregation Control by Chenodeoxycholic Acid

Siriporn Jungsuttiwong,<sup>1</sup> Kanokkorn Sirithip,<sup>2</sup> Narid Prachumrak,<sup>3</sup> Ruangchai Tarsang,<sup>1</sup> Taweesak Sudyoasuk,<sup>3</sup> Supawadee Namuangruk,<sup>4</sup> Nawee Kungwan,<sup>5</sup> Vinich Promarak<sup>3</sup> and Tinnagon Keawin<sup>1,3,\*</sup>

<sup>1</sup>*Center for Organic Electronic and Alternative Energy, Department of Chemistry and Center for Innovation in Chemistry, Faculty of Science, Ubon Ratchathani University, Ubon Ratchathani 34190, Thailand*

<sup>2</sup>*Department of Science and Technology, Faculty of Liberal Arts and Sciences, Roi Et Rajabhat University, Roi Et, 45120, Thailand*

<sup>3</sup>*Department of Material Science and Engineering, School of Molecular Science and Engineering, Vidyasirimedhi Institute of Science and Technology, Rayong 21201, Thailand*

<sup>4</sup>*National Nanotechnology Center, National Science and Technology Development Agency, Klong Luang, Pathumthani 12120, Thailand*

<sup>5</sup>*Department of Chemistry, Faculty of Science, Chiang Mai University, Chiang Mai 50200, Thailand*

*\* All correspondence should be addressed to T. Keawin: Email: [tin\\_krub@yahoo.com](mailto:tin_krub@yahoo.com)*

*Tel.: +664 535 3400 ext.4510, Fax: +664 528 8379*

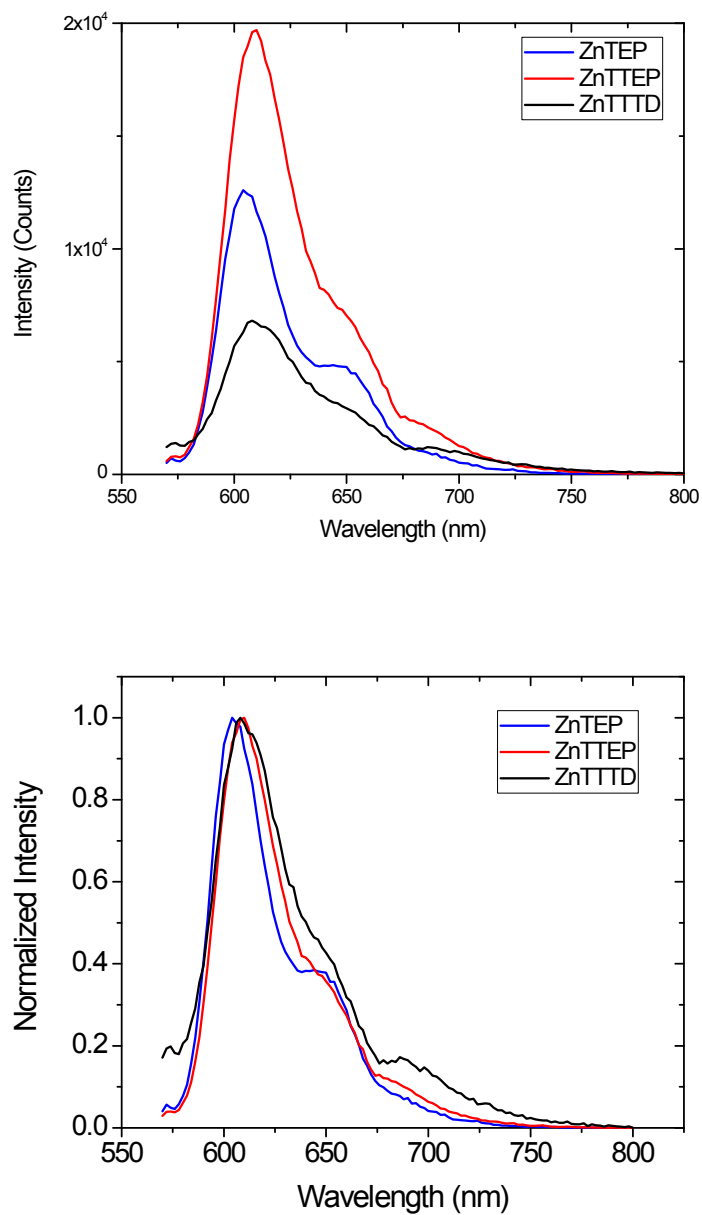

**Figure S1** The fluorescence spectra of dyes **ZnTEP**, **ZnTTEP** and **ZnTTTD**.

a)

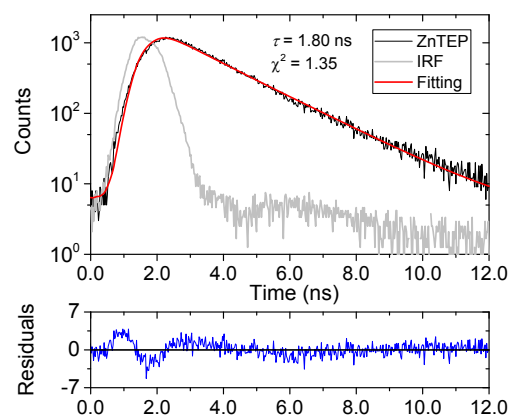

b)

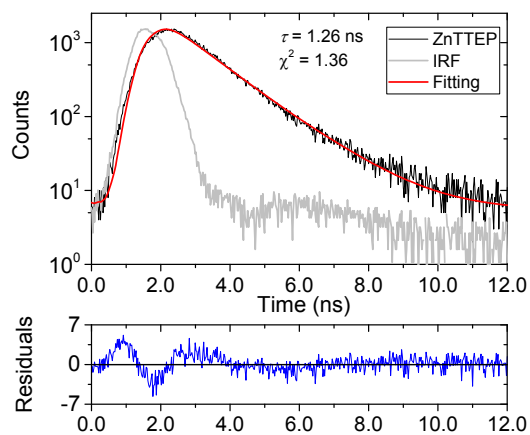

c)

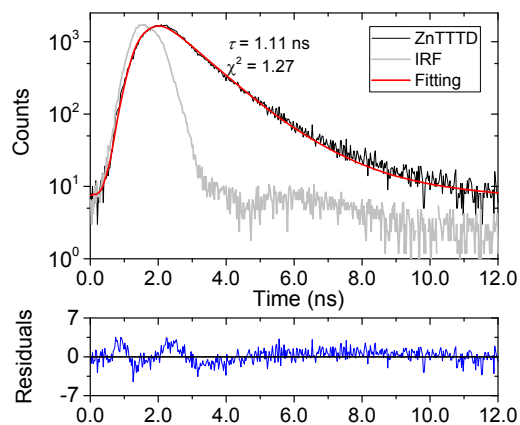

**Figure S2** Time resolved photoluminescence decay of a) ZnTEP, b) ZnTTEP and c) ZnTTTD dye solution in dichloromethane,

Photoluminescence and time resolved photoluminescence decay spectra of dye solution in dichloromethane were measured with an Edinburgh Instruments FLS980 spectrometer. The fluorescence lifetime was performed with Time Correlated Single Photon Counting (TCSP) mode using ELP-445 ( $\lambda$  441.8 nm, linewidth  $< 4.5$  nm, maximum pulsed width@10 MHz  $\sim 100$  ps) picosecond pulsed laser diode as an excitation source. The lifetime data were extracted from the exponential fitting ( $B1\exp(-t/\tau)$ ) from the transient decay curves.

**Table S1** Lifetime data calculated from the transient decay spectra of the dye solution in dichloromethane

| <b>Dyes</b> | <b><math>\tau</math>(ns)</b> | <b>B1</b> | <b><math>\chi^2</math></b> |
|-------------|------------------------------|-----------|----------------------------|
| ZnTEP       | 1.80                         | 0.035     | 1.35                       |
| ZnTTEP      | 1.26                         | 0.040     | 1.36                       |
| ZnTTTD      | 1.11                         | 0.041     | 1.27                       |
